# Supplementary material
Source: PubMed Central journal article supplement (PMC2637374)

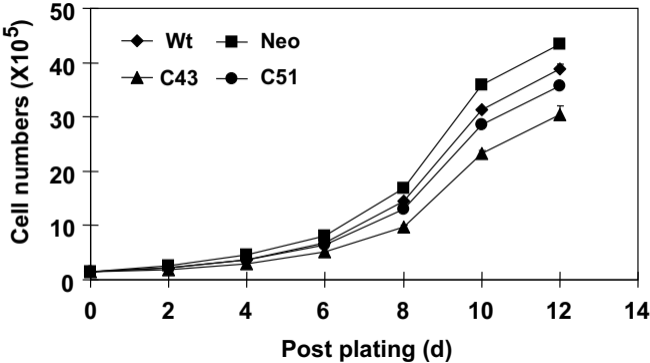

Wt Neo C43 C51

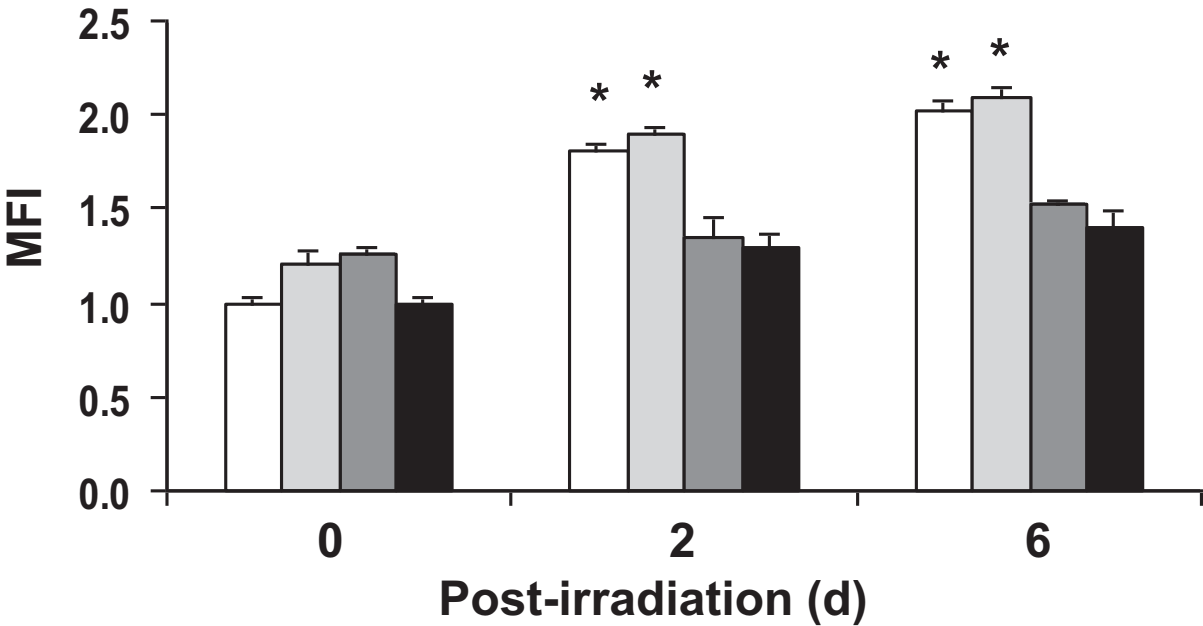

Supplement: NIHMS83928-supplement-01.pdf [file NIHMS83928-supplement-01.pdf]
